# Supplementary figures and images for: Partnerships Between Health Care and Legal Providers in the Veterans Health Administration
Source: Atypon-hosted journal article supplement (doi:10.1176/appi.ps.201600486), 2016-12-01

Diagram 1. Top 5 legal matters of veterans seen in MLPs (n= 791 veterans)

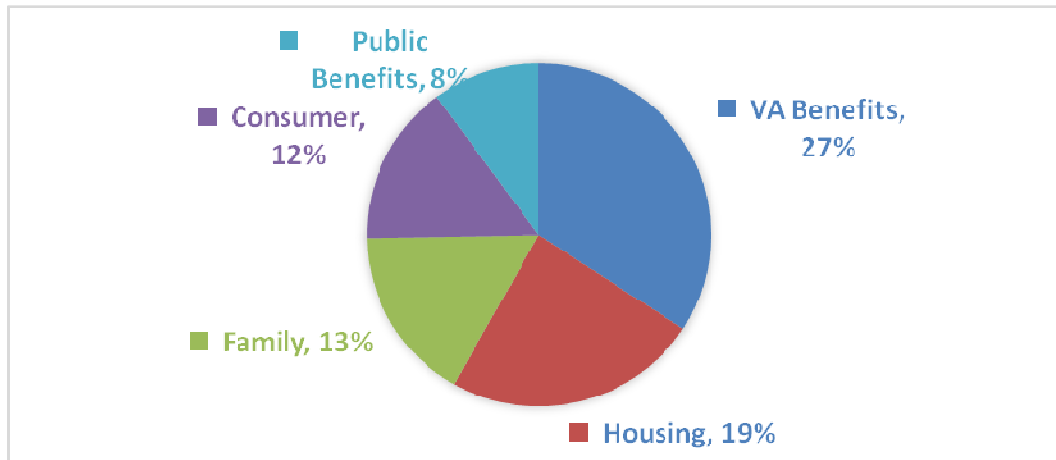

Supplement: appi.ps.201600486.ds001.pdf [file appi.ps.201600486.ds001.pdf]
